# Supplementary material
Source: Springer Nature journal article supplement (https://www.springermedizin.de/resource/supplementary/13049_2011_290_MOESM2_ESM.pdf/9666272)

Percentage of patients

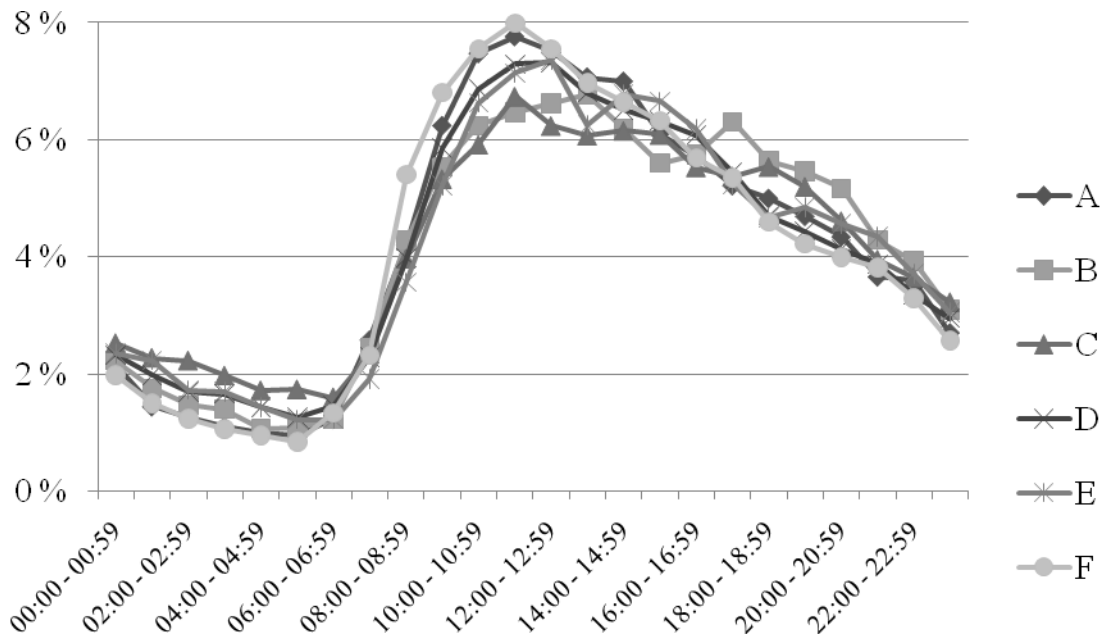

Supplement: MOESM2 [file 9666272]
